# Supplementary material
Source: publisher figshare collection journal article supplement (https://gsajournals.figshare.com/ndownloader/files/16376057)
Supplement: Supplementary file 1 [file 16376057]

## Sheet: Sheet1
Exp	Target Protein (Systematic)	Target Protein (Standard and Aliases)	Number of Phospho(STY)	Mascot Score	PTM Score	Modified Sequence	Phospho(STY) Probabilities	Phospho(STY) Score Diffs	Ratio H/L Normalized	Significance (A)
1	YGL061C	DUO1;YGL061C	4	7.01	52.821	_(ca)S(ph)T(ph)NS(ph)ILDSWINIHS(ph)QAGYIHK_	S(0.998)T(0.998)NS(0.998)ILDS(0.004)WINIHS(0.988)QAGY(0.013)IHK	S(30.41)T(29.96)NS(29.96)ILDS(-29.96)WINIHS(19.36)QAGY(-19.36)IHK	0.00073996	2.39e-31
1	YKL035W	UGP1;YKL035W;YKL248	1	14.3	66.765	_(ca)DVTLRGTVIIVCS(ph)DGHK_	DVT(0.002)LRGT(0.015)VIIVCS(0.983)DGHK	DVT(-27.27)LRGT(-18.18)VIIVCS(18.18)DGHK	0.0014192	2.6831e-26
1	YPR093C	ASR1;YPR093C	1	6.67	60.5	_(ca)NSM(ox)IFAGELRDKHS(ph)VK_	NSMIFAGELRDKHS(1)VK	NS(-49.35)MIFAGELRDKHS(49.35)VK	0.0019333	4.5922e-24
3	YBR255W	MTC4;YBR255W	2	10.02	53.334	_IT(ph)RS(ph)SIPLIPSVSNEQQK_	IT(0.746)RS(0.659)S(0.216)IPLIPS(0.208)VS(0.171)NEQQK	IT(5.64)RS(5.64)S(-6.2)IPLIPS(-5.64)VS(-5.64)NEQQK	0.0024065	1.538e-26
1	YOR205C	FMP38;YOR205C	2	28.38	74.039	_(ca)Y(ph)AIPPFIGS(ph)IEIVLK_	Y(1)AIPPFIGS(1)IEIVLK	Y(74.04)AIPPFIGS(74.04)IEIVLK	0.0040536	3.8279e-19
2	YMR086W	YMR086W;YM9582.10	3	13.04	51.359	_SSMGKGDS(ph)LNS(ph)PLT(ph)K_	SSMGKGDS(1)LNS(1)PLT(1)K	S(-43.87)S(-43.87)MGKGDS(45.78)LNS(43.87)PLT(43.87)K	0.013934	2.2e-10
3	YBR255W	MTC4;YBR255W	2	10.02	53.334	_IT(ph)RS(ph)SIPLIPSVSNEQQK_	IT(0.746)RS(0.659)S(0.216)IPLIPS(0.208)VS(0.171)NEQQK	IT(5.64)RS(5.64)S(-6.2)IPLIPS(-5.64)VS(-5.64)NEQQK	0.015406	7.6058e-14
2	YCR021C	HSP30;YCR021C;YCR21C	1	49.73	154.23	_ASGETAIHEPEPEAEQAVEDT(ph)A_	ASGETAIHEPEPEAEQAVEDT(1)A	AS(-146.89)GET(-146.89)AIHEPEPEAEQAVEDT(146.89)A	0.03318	3.37e-07
2	YOL062C	APM4;AMP1;YOL062C;O1210	1	26.93	69.772	_SSSFLGQGDS(ph)TSDFYDNNK_	S(0.017)S(0.013)S(0.013)FLGQGDS(0.768)T(0.094)S(0.094)DFYDNNK	S(-16.44)S(-17.7)S(-17.7)FLGQGDS(9.11)T(-9.11)S(-9.11)DFY(-40.1)DNNK	0.040377	1.42e-06
3	YOL062C	APM4;AMP1;YOL062C	1	26.93	78.282	_SSSFLGQGDS(ph)TSDFYDNNK_	S(0.002)S(0.002)S(0.002)FLGQGDS(0.764)T(0.115)S(0.115)DFYDNNK	S(-24.95)S(-26.21)S(-26.21)FLGQGDS(8.23)T(-8.23)S(-8.23)DFYDNNK	0.040522	5.5705e-09
2	YML105C	SEC65;YML105C;YM8339.14C	1	5.92	53.282	_AVGEYM(ox)KRHPTTIES(ph)LR_	AVGEYMKRHPT(0.001)T(0.002)IES(0.997)LR	AVGEY(-45.58)MKRHPT(-31.55)T(-26.29)IES(26.29)LR	0.069794	5.21e-05
2	YGR250C	YGR250C	2	28.44	117.35	_YFDS(ph)VRST(ph)PVAEK_	Y(0.006)FDS(0.994)VRS(0.049)T(0.951)PVAEK	Y(-22.45)FDS(22.45)VRS(-12.92)T(12.92)PVAEK	0.083613	0.00014961
1	YHR073W	OSH3;YHR073W	1	5.08	48.701	_RSS(ph)QHSHSSSNGSDNKR_	RS(0.158)S(0.695)QHS(0.008)HS(0.128)S(0.008)S(0.002)NGSDNKR	RS(-6.45)S(6.45)QHS(-19.36)HS(-7.34)S(-19.36)S(-24.62)NGS(-33.94)DNKR	0.09827	8.4329e-05
2	YLR219W	MSC3;YLR219W	2	20.52	92.163	_RLS(ph)TSS(ph)AAPPTSR_	RLS(0.931)T(0.069)S(0.069)S(0.931)AAPPTSR	RLS(11.63)T(-11.63)S(-11.63)S(11.63)AAPPT(-51.52)S(-59.71)R	0.10497	0.00051354
1	YNL121C	TOM70;MAS70;OMP1;YNL121C;N1905	2	20.72	74.389	_FGDIDT(ph)ATAT(ph)PTELSTQPAK_	FGDIDT(0.983)AT(0.017)AT(0.5)PT(0.5)ELSTQPAK	FGDIDT(17.72)AT(-17.72)AT(0)PT(0)ELS(-33.43)T(-40.46)QPAK	0.12446	0.00035769
2	YNL231C	PDR16;SFH3;YNL231C;N1158	1	17.49	74.039	_NKS(ph)EDDLKPLEEEEK_	NKS(1)EDDLKPLEEEEK	NKS(74.04)EDDLKPLEEEEK	0.13005	0.0014923
3	YNL231C	PDR16;SFH3;YNL231C	1	29.43	106.79	_NKS(ph)EDDLKPLEEEEK_	NKS(1)EDDLKPLEEEEK	NKS(36.87)EDDLKPLEEEEK	0.13231	0.00012349
3	YDL058W	USO1;INT1;YDL058W	1	62	140.37	_EAT(ph)ETSSAVQTK_	EAT(1)ETSSAVQTK	EAT(46.83)ET(-46.83)S(-67.31)S(-76.78)AVQT(-130.35)K	0.15064	0.00028981
1	YMR291W	YMR291W	1	11.28	68.459	_KNS(ph)TFVLDPKPPK_	KNS(0.5)T(0.5)FVLDPKPPK	KNS(0)T(0)FVLDPKPPK	0.16011	0.001439
2	YBR025C	OLA1;YBR025C;YBR0309	1	28.13	105.55	_ST(ph)FFQAITR_	S(0.193)T(0.807)FFQAITR	S(-6.2)T(6.2)FFQAIT(-100.71)R	0.1644	0.0043171
3	YBR025C	OLA1;YBR025C	1	41.66	160.14	_ST(ph)FFQAITR_	S(0.451)T(0.549)FFQAITR	S(-0.86)T(0.86)FFQAIT(-154.38)R	0.16702	0.00055233
2	YOR018W	ROD1;YOR018W;OR26.08	1	13.32	87.138	_NFVDDS(ph)EEDVIFQR_	NFVDDS(1)EEDVIFQR	NFVDDS(87.14)EEDVIFQR	0.17061	0.0050562
2	YPL260W	YPL260W	1	5.65	48.701	_LEEIDPS(ph)LSTVMEKLFR_	LEEIDPS(0.985)LS(0.011)T(0.003)VMEKLFR	LEEIDPS(19.36)LS(-19.36)T(-24.62)VMEKLFR	0.17146	0.0051633
3	YNL113W	RPC19;AC19;YNL113W	1	26.92	84.546	_HIQEEEEQDVDM(ox)T(ph)GDEEQEEEPDREK_	HIQEEEEQDVDMT(1)GDEEQEEEPDREK	HIQEEEEQDVDMT(84.55)GDEEQEEEPDREK	0.17502	0.00073275
3	YPL153C	RAD53;LSD1;MEC2;SPK1;YPL153C	1	13.5	69.772	_DFS(ph)IIDEVAGQGAFATVKK_	DFS(0.928)IIDEVAGQGAFAT(0.072)VKK	DFS(11.07)IIDEVAGQGAFAT(-11.07)VKK	0.17558	0.00074691
3	YFL014W	HSP12;GLP1;HOR5;YFL014W	1	30.9	126.1	_GKDNAEGQGES(ph)LADQAR_	GKDNAEGQGES(1)LADQAR	GKDNAEGQGES(126.1)LADQAR	0.17646	0.00076949
2	YFL014W	HSP12;GLP1;HOR5;YFL014W	1	30.9	121.34	_GKDNAEGQGES(ph)LADQAR_	GKDNAEGQGES(1)LADQAR	GKDNAEGQGES(121.34)LADQAR	0.17648	0.0058267
2	YKL140W	TGL1;YKL140W;YKL5	1	32.46	148.47	_RLS(ph)AYLESSK_	RLS(1)AYLESSK	RLS(46.99)AY(-46.99)LES(-106.74)S(-124.27)K	0.18891	0.0076996
1	YNL101W	AVT4;YNL101W;N2185	1	7.96	60.5	_(ca)RAQSTVLNS(ph)NPFYSRK_	RAQS(0.055)T(0.055)VLNS(0.573)NPFY(0.159)S(0.159)RK	RAQS(-10.21)T(-10.21)VLNS(5.58)NPFY(-5.58)S(-5.58)RK	0.18975	0.0033778
2	YDL223C	HBT1;Crem;YDL223C	1	12.37	65.517	_S(ph)ISGGTFGFR_	S(1)ISGGTFGFR	S(33.05)IS(-33.05)GGT(-61.2)FGFR	0.1964	0.0089925
3	YFR017C	IGD1;YFR017C	1	44.67	139.73	_ERES(ph)SIGEHAPGAER_	ERES(0.5)S(0.5)IGEHAPGAER	ERES(0)S(0)IGEHAPGAER	0.19861	0.0015248
1	YDR171W	HSP42;YDR171W;YD9395.04	2	21.03	76.746	_KS(ph)SSFAHLQAPS(ph)PIPDPLQVSKPETR_	KS(0.334)S(0.334)S(0.334)FAHLQAPS(0.985)PIPDPLQVS(0.009)KPET(0.002)R	KS(0)S(0)S(0)FAHLQAPS(20.34)PIPDPLQVS(-20.34)KPET(-27.73)R	0.19955	0.004294
1	YNL248C	RPA49;RRN13;YNL248C;N0880	1	27.15	63.362	_IDSDKLTDS(ph)AIDIVDSVR_	IDS(0.006)DKLT(0.17)DS(0.825)AIDIVDSVR	IDS(-21.69)DKLT(-6.87)DS(6.87)AIDIVDS(-52.84)VR	0.2025	0.0045994
2	YIL107C	PFK26;YIL107C	2	16.48	80.535	_RYS(ph)VIPTAPPS(ph)AR_	RY(0.001)S(0.999)VIPT(0.007)APPS(0.993)AR	RY(-30.95)S(30.95)VIPT(-21.3)APPS(21.3)AR	0.20317	0.010271
2	YDR091C	RLI1;YDR091C	1	61.23	161.82	_IADAT(ph)EDLQNDSASR_	IADAT(1)EDLQNDSASR	IADAT(91.87)EDLQNDS(-91.87)AS(-102.54)R	0.20718	0.011078
3	YFR017C	IGD1;YFR017C	1	39.49	131.77	_RST(ph)NYM(ox)DALNSR_	RST(1)NYMDALNSR	RS(-35.86)T(35.86)NYMDALNS(-97.85)R	0.21016	0.0020853
3	YOR260W	GCD1;TRA3;YOR260W	1	47	77.961	_DSTAATS(ph)GDKLNELVNSALDSTVINEFM(ox)QHSTR_	DS(0.127)T(0.127)AAT(0.127)S(0.618)GDKLNELVNSALDSTVINEFMQHSTR	DS(-6.86)T(-6.86)AAT(-6.86)S(6.86)GDKLNELVNS(-42.16)ALDS(-62.22)T(-64.38)VINEFMQHS(-58.56)T(-58.36)R	0.21058	0.0021082
3	YIL107C	PFK26;PFK2;YIL107C	1	27.83	96.193	_SS(ph)FASDFLSR_	S(0.283)S(0.717)FASDFLSR	S(-4.03)S(4.03)FAS(-50.86)DFLS(-84.36)R	0.21215	0.0021954
2	YIL107C	PFK26;YIL107C	1	27.17	105.55	_SS(ph)FASDFLSR_	S(0.176)S(0.824)FASDFLSR	S(-6.69)S(6.69)FAS(-55.19)DFLS(-66.83)R	0.21217	0.012136
1	YFR053C;YGL253W	HXK1;HKA;YFR053C;HXK2;HEX1;HKB;YGL253W;NRB486	1	18.17	81.177	_KGS(ph)M(ox)ADVPK_	KGS(1)MADVPK	KGS(35.34)MADVPK	0.214	0.0059332
2	YOR260W	GCD1;TIF223;TRA3;YOR260W	1	31.72	85.077	_DSTAATS(ph)GDKLNELVNSALDSTVINEFM(ox)QHSTR_	DS(0.127)T(0.127)AAT(0.127)S(0.618)GDKLNELVNSALDSTVINEFMQHSTR	DS(-6.86)T(-6.86)AAT(-6.86)S(6.86)GDKLNELVNS(-42.16)ALDS(-60.87)T(-63.43)VINEFMQHS(-60.71)T(-60.71)R	0.2142	0.012581
2	YFR017C	YFR017C	1	39.49	115.98	_RST(ph)NYM(ox)DALNSR_	RS(0.001)T(0.999)NY(0.001)MDALNSR	RS(-32.94)T(30.99)NY(-30.99)MDALNS(-84.7)R	0.21785	0.013409
1	YNL015W	PBI2;YNL015W;N2844	1	52.2	202.39	_HNDVIENVEEDKEVHT(ph)N_	HNDVIENVEEDKEVHT(1)N	HNDVIENVEEDKEVHT(51.98)N	0.21859	0.00653
3	YFR017C	IGD1;YFR017C	1	44.67	139.73	_ERESS(ph)IGEHAPGAER_	ERES(0.068)S(0.932)IGEHAPGAER	ERES(-11.37)S(11.37)IGEHAPGAER	0.21964	0.0026467
2	YGL008C	PMA1;YGL008C	1	63.94	105.57	_TDTSSSSSSSSASS(ph)VSAHQPTQEKPAK_	TDTSSSSS(0.001)S(0.005)S(0.024)S(0.005)AS(0.031)S(0.931)VS(0.001)AHQPTQEKPAK	T(-70.37)DT(-66.05)S(-60.89)S(-55.33)S(-43.12)S(-36.5)S(-29.55)S(-22.3)S(-15.82)S(-22.3)AS(-14.74)S(14.74)VS(-29.55)AHQPT(-66.05)QEKPAK	0.21985	0.013876
3	YGL008C	PMA1;KTI10;YGL008C	1	63.94	105.57	_TDTSSSSSSSSASS(ph)VSAHQPTQEKPAK_	TDTSSSS(0.001)S(0.004)S(0.023)S(0.023)S(0.023)AS(0.13)S(0.792)VS(0.004)AHQPTQEKPAK	T(-51.26)DT(-47.77)S(-42.51)S(-42.51)S(-36.22)S(-29.6)S(-22.66)S(-15.4)S(-15.4)S(-15.4)AS(-7.85)S(7.85)VS(-22.66)AHQPT(-59.16)QEKPAK	0.21996	0.0026675
2	YFR017C	YFR017C	1	26.33	108.14	_ERESS(ph)IGEHAPGAER_	ERES(0.06)S(0.94)IGEHAPGAER	ERES(-11.95)S(11.95)IGEHAPGAER	0.22016	0.01395
3	YPL004C	LSP1;YPL004C	1	72.32	143.53	_ALLELLDDSPVT(ph)PGEARPAYDGYEASR_	ALLELLDDS(0.002)PVT(0.998)PGEARPAYDGYEASR	ALLELLDDS(-27.86)PVT(27.86)PGEARPAYDGYEAS(-97.71)R	0.2247	0.0029868
2	YDL160C	DHH1;YDL160C	1	37.64	108.81	_GSINNNFNT(ph)NNNSNTDLDRDWK_	GS(0.009)INNNFNT(0.627)NNNS(0.182)NT(0.182)DLDRDWK	GS(-18.32)INNNFNT(5.37)NNNS(-5.37)NT(-5.37)DLDRDWK	0.22775	0.015812
2	YHL007C	STE20;YHL007C	2	20.28	65.53	_RAT(ph)PVS(ph)TPVISKPSM(ox)TTTPR_	RAT(0.914)PVS(0.542)T(0.542)PVIS(0.002)KPSMTTTPR	RAT(7.28)PVS(0)T(0)PVIS(-26.48)KPS(-41.02)MT(-41.02)T(-41.02)T(-36.76)PR	0.23046	0.016512
2	YML100W	TSL1;YML100W	2	15.96	104.29	_S(ph)ATRS(ph)PSAFNR_	S(0.816)AT(0.184)RS(1)PSAFNR	S(6.47)AT(-6.47)RS(34.63)PS(-45.78)AFNR	0.23299	0.01718
3	YML100W	TSL1;YML100W	2	15.96	127.93	_S(ph)ATRS(ph)PSAFNR_	S(0.653)AT(0.347)RS(1)PSAFNR	S(2.74)AT(-2.74)RS(40.9)PS(-58.16)AFNR	0.23612	0.0038676
1	YAL022C	FUN26;YAL022C	1	52.16	134.89	_KPILAVPEPALADT(ph)HSEEISR_	KPILAVPEPALADT(0.813)HS(0.176)EEIS(0.011)R	KPILAVPEPALADT(6.65)HS(-6.65)EEIS(-18.6)R	0.23787	0.0094654
3	YBR081C	SPT7;GIT2;YBR081C	1	25.89	72.844	_VGAENDGDS(ph)SLFLR_	VGAENDGDS(0.5)S(0.5)LFLR	VGAENDGDS(0)S(0)LFLR	0.23971	0.0041781
1	YGR267C	FOL2;YGR267C;G9349	2	24.61	103.48	_HET(ph)PLNIRPTS(ph)PYTLNPPVER_	HET(1)PLNIRPT(0.089)S(0.733)PY(0.089)T(0.089)LNPPVER	HET(69.38)PLNIRPT(-9.16)S(9.16)PY(-9.16)T(-9.16)LNPPVER	0.24449	0.010641
2	YBR068C	BAP2;YBR068C;YBR0629	1	47.35	116.12	_ETSPDSIS(ph)IR_	ETSPDS(0.001)IS(0.999)IR	ET(-99.1)S(-74.39)PDS(-28.35)IS(28.35)IR	0.251	0.022385
3	YIL135C	VHS2;YIL135C	1	44.47	175.85	_RPS(ph)TIGLDR_	RPS(1)TIGLDR	RPS(44.92)T(-44.92)IGLDR	0.25572	0.0057768
3	YLR058C	SHM2;SHMT2;YLR058C	1	49.32	198.61	_LITSHLVDTDPEVDS(ph)IIKDEIER_	LITSHLVDTDPEVDS(1)IIKDEIER	LIT(-159.07)S(-164.27)HLVDT(-111.22)DPEVDS(111.22)IIKDEIER	0.25724	0.0059479
1	YNL173C	MDG1;YNL173C;N1673	1	33.24	92.082	_DTSTSADAEAS(ph)EDQNKEPLSK_	DTSTSADAEAS(1)EDQNKEPLSK	DT(-58.96)S(-58.96)T(-58.96)S(-58.96)ADAEAS(58.96)EDQNKEPLS(-65.27)K	0.25936	0.013607
3	YFL021W	GAT1;NIL1;MEP80;YFL021W	1	28.66	156.57	_RNPSPSIVKPGS(ph)R_	RNPSPSIVKPGS(1)R	RNPS(-36.52)PS(-36.52)IVKPGS(36.52)R	0.26104	0.0063899
2	YFL021W	GAT1;YFL021W	1	15.31	117.35	_RNPSPSIVKPGS(ph)R_	RNPSPS(0.006)IVKPGS(0.994)R	RNPS(-34.4)PS(-22.45)IVKPGS(22.45)R	0.26144	0.025759
1	YPL160W	CDC60;YPL160W;P2564	1	25.14	89.028	_NFDNVPAEEEEIKEET(ph)PAEKDHEDVTK_	NFDNVPAEEEEIKEET(0.5)PAEKDHEDVT(0.5)K	NFDNVPAEEEEIKEET(0)PAEKDHEDVT(0)K	0.26174	0.014125
3	YAL035W	FUN12;eIF5B;yIF2;YAL035W	2	20.19	96.484	_STPAAT(ph)PAAT(ph)PTPSSASPNKK_	S(0.297)T(0.169)PAAT(0.534)PAAT(0.635)PT(0.355)PS(0.006)S(0.005)ASPNKK	S(-2.59)T(-5.07)PAAT(2.59)PAAT(2.59)PT(-2.59)PS(-20.8)S(-21.84)AS(-37.91)PNKK	0.2656	0.0069482
3	YJL080C	SCP160;YJL080C	1	24.45	92.163	_KPT(ph)PLPSLK_	KPT(1)PLPSLK	KPT(59.71)PLPS(-59.71)LK	0.27114	0.0076709
2	YLR058C	SHM2;SHMT2;YLR058C;L2156	1	49.32	198.61	_LITSHLVDTDPEVDS(ph)IIKDEIER_	LITSHLVDTDPEVDS(1)IIKDEIER	LIT(-167.57)S(-167.57)HLVDT(-111.22)DPEVDS(111.22)IIKDEIER	0.27326	0.029888
1	YKR098C	UBP11;YKR098C	1	6.99	54.399	_FDGSLHEIPNELTKPTNDNS(ph)KEDIVR_	FDGSLHEIPNELT(0.002)KPT(0.061)NDNS(0.937)KEDIVR	FDGS(-42.91)LHEIPNELT(-27.96)KPT(-11.84)NDNS(11.84)KEDIVR	0.27347	0.016852
1	YNL304W	YPT11;YNL304W;N0410	2	3.02	38.226	_S(ph)GAFGRSGSSGSS(ph)TVIEPSNIK_	S(0.52)GAFGRS(0.41)GS(0.105)S(0.105)GS(0.335)S(0.424)T(0.099)VIEPS(0.001)NIK	S(0.85)GAFGRS(-0.85)GS(-6.63)S(-6.63)GS(-0.85)S(0.85)T(-6.63)VIEPS(-30.54)NIK	0.27393	0.016964
2	YNL267W	PIK1;YNL267W;N0795	1	19.63	96.193	_SST(ph)PTSPIDLIDPIK_	S(0.104)S(0.061)T(0.835)PTSPIDLIDPIK	S(-9.06)S(-11.37)T(9.06)PT(-41.92)S(-59.13)PIDLIDPIK	0.27543	0.030682
2	YPL004C	LSP1;YPL004C	1	94.51	174.31	_ALLELLDDSPVT(ph)PGEAR_	ALLELLDDSPVT(1)PGEAR	ALLELLDDS(-64.92)PVT(64.92)PGEAR	0.28109	0.032806
1	YAL038W;YOR347C	PYK1;CDC19;YAL038W;PYK2;YOR347C;O6342	1	42.36	153.75	_T(ph)SIIGTIGPK_	T(0.823)S(0.177)IIGTIGPK	T(6.69)S(-6.69)IIGT(-74.94)IGPK	0.28288	0.019251
3	YFR014C	CMK1;YFR014C	1	46.79	172.81	_VCSS(ph)DSDLPGSDIK_	VCSS(0.95)DS(0.05)DLPGSDIK	VCS(-37.09)S(12.78)DS(-12.78)DLPGS(-59.75)DIK	0.28388	0.0095195
2	YFR014C	CMK1;YFR014C	1	42.59	155.64	_VCSS(ph)DSDLPGSDIK_	VCS(0.001)S(0.964)DS(0.034)DLPGSDIK	VCS(-28.34)S(14.5)DS(-14.5)DLPGS(-68.5)DIK	0.28453	0.03413
2	YER052C	HOM3;YER052C	1	24.01	93.536	_T(ph)NTSNQFEHAIDER_	T(0.591)NT(0.372)S(0.037)NQFEHAIDER	T(2)NT(-2)S(-12.06)NQFEHAIDER	0.28459	0.034153
2	YIL107C	PFK26;YIL107C	1	27.17	105.55	_S(ph)SFASDFLSR_	S(0.718)S(0.282)FASDFLSR	S(4.07)S(-4.07)FAS(-42.55)DFLS(-88.53)R	0.28489	0.034271
3	YDR432W	NPL3;MTR13;MTS1;NOP3;NAB1;YDR432W	1	35.81	104.52	_NLPEGCS(ph)WQDLK_	NLPEGCS(1)WQDLK	NLPEGCS(35.93)WQDLK	0.28623	0.0098887
3	YBR054W	YRO2;YBR054W	1	63.97	203.49	_KAQEEEEDVATDS(ph)E_	KAQEEEEDVAT(0.018)DS(0.982)E	KAQEEEEDVAT(-17.48)DS(17.48)E	0.28881	0.010307
2	YDR432W	NPL3;MTR13;MTS1;NAB1;NOP3;YDR432W;D9461.19	1	35.81	88.268	_NLPEGCS(ph)WQDLK_	NLPEGCS(1)WQDLK	NLPEGCS(35.93)WQDLK	0.28902	0.035903
3	YBR001C	NTH2;YBR001C	1	85.04	259.71	_RGS(ph)EDDSFLSSQGNR_	RGS(1)EDDSFLSSQGNR	RGS(74.09)EDDS(-74.09)FLS(-98.85)S(-105.64)QGNR	0.28923	0.010376
2	YPL116W	HOS3;YPL116W;LPH11W	1	13.77	76.318	_TVEDIT(ph)IDDISR_	TVEDIT(1)IDDISR	T(-54.86)VEDIT(40.38)IDDIS(-40.38)R	0.29238	0.037258
2	YBR054W	YRO2;YBR054W;YBR0507	1	63.97	203.49	_KAQEEEEDVATDS(ph)E_	KAQEEEEDVAT(0.001)DS(0.999)E	KAQEEEEDVAT(-32.65)DS(32.65)E	0.29442	0.038093
2	YDR171W	HSP42;YDR171W;YD9395.04	1	29.71	74.039	_DKS(ph)EAPKEEAGETNK_	DKS(1)EAPKEEAGETNK	DKS(44.53)EAPKEEAGET(-44.53)NK	0.29638	0.038905
2	YDR005C	MAF1;YDR005C;YD8119.11C	1	40.23	131.75	_RDS(ph)NSFWEQK_	RDS(1)NSFWEQK	RDS(43.98)NS(-43.98)FWEQK	0.29653	0.038968
2	YOR109W	INP53;SJL3;SOP2;YOR109W;YOR3231w	1	26.54	111.83	_S(ph)VSAPAPSTSK_	S(0.982)VS(0.018)APAPSTSK	S(17.47)VS(-17.47)APAPS(-89.52)T(-89.52)S(-101.57)K	0.29675	0.039059
3	YOR109W	INP53;SJL3;SOP2;YOR109W	1	29.37	147.5	_S(ph)VSAPAPSTSK_	S(0.995)VS(0.005)APAPSTSK	S(23.28)VS(-23.28)APAPS(-120.52)T(-120.52)S(-136.66)K	0.29696	0.0117
3	YDR171W	HSP42;YDR171W	1	40.4	86.822	_DKS(ph)EAPKEEAGETNK_	DKS(1)EAPKEEAGETNK	DKS(49.45)EAPKEEAGET(-49.45)NK	0.30152	0.012529
2	YOR273C	TPO4;YOR273C;O5440	1	30.68	88.268	_THT(ph)QPVPASFDR_	T(0.008)HT(0.992)QPVPASFDR	T(-20.96)HT(20.96)QPVPAS(-60.43)FDR	0.30206	0.041304
2	YGR178C	PBP1;MRS16;YGR178C	2	36.6	78.538	_S(ph)GSNIS(ph)QGQSSTGHTTR_	S(0.592)GS(0.408)NIS(0.98)QGQS(0.017)S(0.003)TGHTTR	S(1.62)GS(-1.62)NIS(18.06)QGQS(-18.06)S(-26.21)T(-40.56)GHT(-56.22)T(-56.22)R	0.30722	0.043544
3	YGR162W	TIF4631;eIF4g!;YGR162W	2	24.19	80.308	_LKETSDS(ph)TSTS(ph)TPTPTPSTNDSK_	LKET(0.005)S(0.006)DS(0.5)T(0.136)S(0.164)T(0.208)S(0.452)T(0.375)PT(0.062)PT(0.012)PS(0.033)T(0.029)NDS(0.019)K	LKET(-20.68)S(-20.08)DS(4.2)T(-5.83)S(-5.02)T(-4.2)S(0.85)T(-0.85)PT(-8.89)PT(-16.27)PS(-11.72)T(-12.4)NDS(-14.35)K	0.30816	0.013804
2	YGR280C	PXR1;GNO1;YGR280C	1	27.77	96.193	_SSES(ph)ASNIPDAVNTR_	S(0.01)S(0.006)ES(0.979)AS(0.006)NIPDAVNTR	S(-20.1)S(-22.15)ES(20.1)AS(-22.15)NIPDAVNT(-88.18)R	0.30916	0.044402
2	YOR052C	YOR052C;YOR29-03	1	14.64	62.135	_SDS(ph)GTVLGAIPLNSR_	S(0.187)DS(0.796)GT(0.017)VLGAIPLNSR	S(-6.29)DS(6.29)GT(-16.8)VLGAIPLNS(-56.89)R	0.31097	0.04521
3	YNL212W	VID27;YNL212W	1	58.93	178.44	_SSLTAS(ph)ADDLK_	SSLT(0.002)AS(0.998)ADDLK	S(-82.24)S(-89.28)LT(-28.2)AS(28.2)ADDLK	0.31118	0.014411
3	YOR052C	TMC1;YOR052C	1	21.66	106.79	_SDS(ph)GTVLGAIPLNSR_	S(0.263)DS(0.73)GT(0.007)VLGAIPLNSR	S(-4.44)DS(4.44)GT(-19.97)VLGAIPLNS(-98.5)R	0.31177	0.01453
2	YOL151W	GRE2;YOL151W	1	20.21	65.094	_ETIDDTAS(ph)QILK_	ETIDDT(0.009)AS(0.991)QILK	ET(-44.43)IDDT(-20.22)AS(20.22)QILK	0.31223	0.045776
2	YHR135C	YCK1;CKI2;YHR135C	1	5.13	49.858	_TPEQHPNDDNSS(ph)LAASHK_	TPEQHPNDDNS(0.033)S(0.84)LAAS(0.127)HK	T(-43.44)PEQHPNDDNS(-14.1)S(8.19)LAAS(-8.19)HK	0.31265	0.045967
1	YGL009C	LEU1;YGL009C	1	42.22	109.39	_DQDQSS(ph)PKVEVTSEDEK_	DQDQS(0.067)S(0.933)PKVEVTSEDEK	DQDQS(-11.44)S(11.44)PKVEVT(-42.63)S(-51.95)EDEK	0.31283	0.028169
3	YOL151W	GRE2;YOL151W	1	21.42	104.52	_ETIDDTAS(ph)QILK_	ETIDDT(0.074)AS(0.926)QILK	ET(-49.87)IDDT(-10.98)AS(10.98)QILK	0.31285	0.014753
2	YNL212W	VID27;YNL212W;N1327	1	56.63	122.28	_SSLTAS(ph)ADDLK_	SSLT(0.001)AS(0.999)ADDLK	S(-82.16)S(-83.65)LT(-31.08)AS(31.08)ADDLK	0.31292	0.046089
2	YGR162W	TIF4631;YGR162W	2	23.44	80.308	_LKETSDSTST(ph)S(ph)TPTPTPSTNDSK_	LKET(0.004)S(0.004)DS(0.132)T(0.132)S(0.132)T(0.533)S(0.342)T(0.342)PT(0.339)PT(0.02)PS(0.006)T(0.006)NDS(0.006)K	LKET(-23.83)S(-23.83)DS(-6.8)T(-6.8)S(-6.8)T(6.8)S(0)T(0)PT(0)PT(-13.07)PS(-18.76)T(-18.76)NDS(-18.76)K	0.31427	0.046701
3	YHR135C	YCK1;CKI2;YHR135C	1	5.13	49.858	_TPEQHPNDDNSS(ph)LAASHK_	TPEQHPNDDNS(0.033)S(0.84)LAAS(0.127)HK	T(-43.18)PEQHPNDDNS(-14.1)S(8.19)LAAS(-8.19)HK	0.31692	0.015607
1	YOL004W	SIN3;CPE1;GAM2;RPD1;SDI1;SDS16;UME4;YOL004W	1	42.38	79.381	_VT(ph)TPMGTTTVNNNISPSGR_	VT(0.598)T(0.402)PMGTTTVNNNISPSGR	VT(1.73)T(-1.73)PMGT(-35.36)T(-42.84)T(-49.71)VNNNIS(-73.02)PS(-69.17)GR	0.31864	0.030126
1	YPL004C	LSP1;YPL004C	1	47.55	121.34	_ALLELLDDSPVT(ph)PGEAR_	ALLELLDDSPVT(1)PGEAR	ALLELLDDS(-63.9)PVT(63.9)PGEAR	0.33235	0.03503
1	YLL043W	FPS1;YLL043W	1	39.74	74.039	_TTGAQTNMESNES(ph)PR_	TTGAQTNMES(0.01)NES(0.99)PR	T(-65.82)T(-66.02)GAQT(-51.31)NMES(-19.77)NES(19.77)PR	0.33274	0.035176
1	YBL051C	PIN4;MDT1;YBL051C;YBL0516;YBL0506	1	27.34	88.268	_SLS(ph)GLDLQNQNK_	S(0.008)LS(0.992)GLDLQNQNK	S(-20.96)LS(20.96)GLDLQNQNK	0.33435	0.035781
1	YGL009C	LEU1;YGL009C	1	42.22	109.39	_DQDQS(ph)SPKVEVTSEDEK_	DQDQS(0.933)S(0.067)PKVEVTSEDEK	DQDQS(11.44)S(-11.44)PKVEVT(-68.84)S(-76.35)EDEK	0.33477	0.03594
1	YLL018C	DPS1;APS;APS1;YLL018C;L1295	1	17.82	78.996	_AVEES(ph)AEPAQVILGEDGKPLSK_	AVEES(1)AEPAQVILGEDGKPLSK	AVEES(72.51)AEPAQVILGEDGKPLS(-72.51)K	0.34855	0.041343
1	YAL038W;YOR347C	PYK1;CDC19;YAL038W;PYK2;YOR347C;O6342	1	42.36	153.75	_RTS(ph)IIGTIGPK_	RT(0.004)S(0.992)IIGT(0.004)IGPK	RT(-24.16)S(24.16)IIGT(-24.16)IGPK	0.35123	0.042438
3	YMR196W	YMR196W	1	21.47	82.295	_IGGTHSGLT(ph)PQSSISSDK_	IGGTHS(0.003)GLT(0.975)PQS(0.021)S(0.001)ISS(0.001)DK	IGGT(-38.92)HS(-24.57)GLT(16.77)PQS(-16.77)S(-31.96)IS(-38.92)S(-31.96)DK	0.35338	0.024652
3	YPL263C	KEL3;YPL263C	1	19.19	84.823	_TKS(ph)FELCEDR_	T(0.01)KS(0.99)FELCEDR	T(-20.08)KS(20.08)FELCEDR	0.3563	0.025487
3	YOL145C	CTR9;CDP1;YOL145C	1	47.6	160.03	_TLSDS(ph)DEDDDDVVK_	TLSDS(1)DEDDDDVVK	T(-55.5)LS(-45.31)DS(45.31)DEDDDDVVK	0.35648	0.02554
1	YPR160W	GPH1;YPR160W;P9584.1	1	24.25	122.28	_RLT(ph)GFLPQEIK_	RLT(1)GFLPQEIK	RLT(122.28)GFLPQEIK	0.36207	0.047024
3	YBR169C	SSE2;YBR169C	1	32.96	84.57	_S(ph)TPSLVGFGPR_	S(0.664)T(0.336)PSLVGFGPR	S(2.95)T(-2.95)PS(-36.41)LVGFGPR	0.36242	0.027288
3	YER052C	HOM3;BOR1;SIL4;THR3;YER052C	1	30.27	119.22	_KGESTPPHPPENLS(ph)SSFYEK_	KGES(0.002)TPPHPPENLS(0.89)S(0.106)S(0.002)FYEK	KGES(-26.81)T(-35.08)PPHPPENLS(9.26)S(-9.26)S(-26.81)FYEK	0.36413	0.027804
3	YAL038W	CDC19;PYK1;YAL038W	1	57.18	143.95	_LTS(ph)LNVVAGSDLR_	LT(0.038)S(0.962)LNVVAGSDLR	LT(-14.05)S(14.05)LNVVAGS(-33.63)DLR	0.37122	0.030004
3	YHR195W	NVJ1;VAB36;YHR195W	1	55.44	149.52	_DCSSSS(ph)EVESQSK_	DCS(0.001)S(0.178)S(0.178)S(0.643)EVESQSK	DCS(-29.48)S(-5.58)S(-5.58)S(5.58)EVES(-66.57)QS(-106.56)K	0.37556	0.031399
3	YPR160W	GPH1;YPR160W	1	41.85	176.78	_LT(ph)GFLPQEIK_	LT(1)GFLPQEIK	LT(176.78)GFLPQEIK	0.3767	0.031769
3	YLR220W	CCC1;YLR220W	1	51.27	134.89	_NSAQDLENS(ph)PM(ox)SVGK_	NSAQDLENS(0.995)PMS(0.005)VGK	NS(-77.3)AQDLENS(23.32)PMS(-23.32)VGK	0.37681	0.031807
3	YJL057C	IKS1;YJL057C	1	58.64	195.04	_RAS(ph)AGVESESSR_	RAS(1)AGVESESSR	RAS(140.39)AGVES(-140.39)ES(-170.26)S(-176.04)R	0.38565	0.034781
3	YOL016C	CMK2;CMK1;YOL016C	1	95.72	96.822	_NM(ox)YSLGDDGDNDIEENS(ph)LNESLLDGVTHSLDDLR_	NMYSLGDDGDNDIEENS(0.998)LNES(0.002)LLDGVTHSLDDLR	NMYS(-62.48)LGDDGDNDIEENS(28.21)LNES(-28.21)LLDGVT(-52.24)HS(-46.66)LDDLR	0.38767	0.035478
3	YAL035W	FUN12;eIF5B;yIF2;YAL035W	2	20.19	96.484	_S(ph)TPAAT(ph)PAATPTPSSASPNKK_	S(0.654)T(0.386)PAAT(0.905)PAAT(0.049)PT(0.006)PSSASPNKK	S(2.52)T(-2.52)PAAT(11.55)PAAT(-12.81)PT(-22.37)PS(-37.84)S(-38.61)AS(-40.11)PNKK	0.4093	0.043466
3	YPR019W	MCM4;CDC54;HCD21;YPR019W	1	53.86	160.03	_NNS(ph)QNLSQGEGNIR_	NNS(1)QNLSQGEGNIR	NNS(87.18)QNLS(-87.18)QGEGNIR	0.41548	0.045909
3	YER052C	HOM3;BOR1;SIL4;THR3;YER052C	1	30.27	119.22	_KGES(ph)TPPHPPENLSSSFYEK_	KGES(0.982)T(0.018)PPHPPENLSSSFYEK	KGES(17.25)T(-17.25)PPHPPENLS(-94.49)S(-99.66)S(-98.68)FYEK	0.42225	0.048665
2	YGR229C	SMI1;KNR4;KTR4;YGR229C;G8553	2	50.77	169.63	_SQQGLSHVTSTGS(ph)SSS(ph)M(ox)ER_	SQQGLSHVTST(0.003)GS(0.948)S(0.047)S(0.005)S(0.997)MER	S(-139.96)QQGLS(-110.35)HVT(-71.7)S(-49.59)T(-25.69)GS(13.07)S(-13.07)S(-25.69)S(25.69)MER	2.5173	0.054998
2	YNL118C	DCP2;PSU1;YNL118C;N1917	1	17.53	54.274	_NPISSTVSSNQQS(ph)PK_	NPISSTVS(0.003)S(0.019)NQQS(0.978)PK	NPIS(-48.67)S(-42.44)T(-37.48)VS(-24.77)S(-17.21)NQQS(17.21)PK	2.5204	0.054766
2	YOL059W	GPD2;GPD3;YOL059W;O1222	1	35.3	91.202	_S(ph)DSAVSIVHLK_	S(0.509)DS(0.413)AVS(0.078)IVHLK	S(0.91)DS(-0.91)AVS(-8.15)IVHLK	2.5392	0.05337
2	YDR443C	SSN2;MED13;NUT8;RYE3;SCA1;SRB9;UME2;YDR443C	1	34.5	122.28	_DFS(ph)PNFTGIDK_	DFS(1)PNFTGIDK	DFS(74.13)PNFT(-74.13)GIDK	2.5459	0.052883
2	YJR002W	MPP10;YJR002W;J1411;YJR83.5	1	47.7	143.48	_HSS(ph)PDPYGINDK_	HS(0.001)S(0.999)PDPYGINDK	HS(-29.13)S(29.13)PDPY(-42.54)GINDK	2.5672	0.051366
2	YNL180C	RHO5;YNL180C;N1644	1	33.31	124.53	_YAIYEPES(ph)PNQK_	YAIYEPES(1)PNQK	Y(-103.08)AIY(-69.93)EPES(69.93)PNQK	2.5682	0.051297
2	YDR382W	RPP2B;L12EIA;RPL45;RPLA4;YDR382W	1	33.18	104.29	_INELLS(ph)SLEGK_	INELLS(0.908)S(0.092)LEGK	INELLS(9.93)S(-9.93)LEGK	2.5799	0.050481
2	YOR276W	CAF20;CAF2;CAP20;YOR276W;O5453W	1	38.61	106.97	_KKGS(ph)GEDDEEETETTPTSTVPVATIAQETLK_	KKGS(0.551)GEDDEEET(0.02)ET(0.167)T(0.167)PT(0.02)S(0.055)T(0.02)VPVAT(0.002)IAQET(0.001)LK	KKGS(5.2)GEDDEEET(-14.49)ET(-5.2)T(-5.2)PT(-14.49)S(-10.04)T(-14.49)VPVAT(-25.3)IAQET(-30.18)LK	2.6209	0.047738
1	YDL131W	LYS21;YDL131W;D2195	1	24.93	135.71	_DFHAELS(ph)TPLLKPVNK_	DFHAELS(0.856)T(0.144)PLLKPVNK	DFHAELS(7.75)T(-7.75)PLLKPVNK	2.6429	0.049668
2	YLL021W	SPA2;PEA1;YLL021W;L1209	1	19.78	75.015	_KPASFLNDVEEEES(ph)PVKPLK_	KPASFLNDVEEEES(1)PVKPLK	KPAS(-54.21)FLNDVEEEES(54.21)PVKPLK	2.6586	0.045363
3	YLL021W	SPA2;FUS6;PEA1;PPF1;YLL021W	1	25.44	91.413	_KPASFLNDVEEEES(ph)PVKPLK_	KPASFLNDVEEEES(1)PVKPLK	KPAS(-65.42)FLNDVEEEES(65.42)PVKPLK	2.6611	0.047497
1	YOR153W	PDR5;LEM1;STS1;YDR1;YOR153W	2	12.31	65.292	_M(ox)LQESS(ph)EEES(ph)DTYGEIGLSK_	MLQES(0.121)S(0.878)EEES(0.494)DT(0.494)Y(0.011)GEIGLSK	MLQES(-8.62)S(8.62)EEES(0)DT(0)Y(-16.74)GEIGLS(-31.36)K	2.6716	0.047758
1	YMR240C	CUS1;YMR240C;YM9408.02C	1	46.83	119.22	_HTAEDELEDTPS(ph)DGIEEHLSAR_	HTAEDELEDT(0.055)PS(0.931)DGIEEHLS(0.014)AR	HT(-40.01)AEDELEDT(-12.27)PS(12.27)DGIEEHLS(-18.2)AR	2.6761	0.047462
1	YLR323C	CWC24;YLR323C;L8543.3	1	23.66	105.4	_RPS(ph)DDNELVLNMSGK_	RPS(1)DDNELVLNMSGK	RPS(100.16)DDNELVLNMS(-100.16)GK	2.7019	0.045824
3	YOL059W	GPD2;GPD3;YOL059W	2	35.3	159.79	_SDS(ph)AVS(ph)IVHLK_	S(0.096)DS(0.904)AVS(1)IVHLK	S(-9.76)DS(9.76)AVS(111.09)IVHLK	2.7073	0.044358
1	YDR310C	SUM1;YDR310C;D9740.19	1	38.03	100.04	_TAGDDGALDQTENTSIS(ph)PK_	TAGDDGALDQTENTS(0.001)IS(0.999)PK	T(-90.37)AGDDGALDQT(-70.37)ENT(-39.38)S(-30.27)IS(30.27)PK	2.7074	0.045487
2	YOL059W	GPD2;GPD3;YOL059W;O1222	2	35.3	91.202	_SDS(ph)AVS(ph)IVHLK_	S(0.099)DS(0.901)AVS(1)IVHLK	S(-9.59)DS(9.59)AVS(61.21)IVHLK	2.7112	0.042255
1	YLR196W	PWP1;YLR196W;L8167.10	1	82.68	226.26	_ATLEEAEGES(ph)GVEDDAATGSSNK_	ATLEEAEGES(1)GVEDDAATGSSNK	AT(-100.18)LEEAEGES(100.18)GVEDDAAT(-150.3)GS(-182.78)S(-182.78)NK	2.7351	0.04381
3	YER008C	SEC3;PSL1;YER008C	1	39.49	124.18	_APYS(ph)SNSTLNEVNK_	APYS(0.5)S(0.5)NSTLNEVNK	APYS(0)S(0)NS(-41.94)T(-41.94)LNEVNK	2.7377	0.042417
1	YER026C	CHO1;PSS;PSS1;YER026C	2	57.53	146.78	_DENDGY(ph)ASDEVGGTLS(ph)R_	DENDGY(0.5)AS(0.5)DEVGGT(0.109)LS(0.891)R	DENDGY(0)AS(0)DEVGGT(-9.12)LS(9.12)R	2.7463	0.043148
1	YBL067C	UBP13;YBL067C;YBL0621	1	44.7	62.072	_KKEELPIADDLDTAIDDSFVS(ph)NTPIK_	KKEELPIADDLDTAIDDS(0.146)FVS(0.708)NT(0.146)PIK	KKEELPIADDLDT(-44.17)AIDDS(-6.85)FVS(6.85)NT(-6.85)PIK	2.7758	0.041463
2	YJR001W	AVT1;YJR001W;J1409;YJR83.4	1	33.91	100.94	_FTNNDM(ox)DS(ph)IVVK_	FTNNDMDS(1)IVVK	FT(-80.28)NNDMDS(80.28)IVVK	2.7943	0.037808
3	YFL005W	SEC4;SRO6;YFL005W	1	46.01	77.455	_EGNISINS(ph)GSGNSSK_	EGNIS(0.001)INS(0.886)GS(0.113)GNSSK	EGNIS(-32.12)INS(8.94)GS(-8.94)GNS(-40.08)S(-46.59)K	2.8211	0.03753
3	YML093W	UTP14;YML093W	1	30.13	79.087	_VQT(ph)LSDVENEEKENIDSEALK_	VQT(0.5)LS(0.5)DVENEEKENIDSEALK	VQT(0)LS(0)DVENEEKENIDS(-71.29)EALK	2.86	0.035459
1	YNL118C	DCP2;PSU1;YNL118C;N1917	1	35.34	84.823	_NPISSTVSS(ph)NQQSPK_	NPIS(0.012)S(0.021)T(0.021)VS(0.16)S(0.626)NQQS(0.16)PK	NPIS(-17.12)S(-14.71)T(-14.71)VS(-5.93)S(5.93)NQQS(-5.93)PK	2.8689	0.03659
1	YHR146W	YHR146W	1	27.9	100.94	_REST(ph)EGVLDGSK_	RES(0.082)T(0.918)EGVLDGSK	RES(-10.49)T(10.49)EGVLDGS(-50.59)K	2.8726	0.036411
2	YFL005W	SEC4;SRO6;YFL005W	1	44.81	74.039	_EGNISINS(ph)GSGNSSK_	EGNIS(0.001)INS(0.911)GS(0.087)GNSSK	EGNIS(-28.7)INS(10.19)GS(-10.19)GNS(-36.97)S(-44.53)K	2.8729	0.034063
1	YNL166C	BNI5;YNL166C;N1706	1	71.28	120.05	_Y(ph)DSPVSSPITSASELGSIAK_	Y(0.957)DS(0.043)PVSSPITSASELGSIAK	Y(13.5)DS(-13.5)PVS(-62.09)S(-70.36)PIT(-91.86)S(-91.86)AS(-107.42)ELGS(-113.37)IAK	2.8891	0.035618
1	YDR135C	YCF1;YDR135C;YD9302.11C	1	9.97	57.955	_RASDAT(ph)LGSIDFGDDENIAK_	RAS(0.005)DAT(0.99)LGS(0.005)IDFGDDENIAK	RAS(-23.19)DAT(23.19)LGS(-23.19)IDFGDDENIAK	2.8938	0.035396
2	YML093W	UTP14;YML093W	1	16.44	72.844	_VQT(ph)LSDVENEEKENIDSEALK_	VQT(0.5)LS(0.5)DVENEEKENIDSEALK	VQT(0)LS(0)DVENEEKENIDS(-65.84)EALK	2.9167	0.032153
3	YML034W	SRC1;HEH1;YML033W	1	36.57	126.1	_HLNLLSS(ph)DSEIEQDYQK_	HLNLLS(0.009)S(0.991)DSEIEQDYQK	HLNLLS(-20.45)S(20.45)DS(-39.07)EIEQDYQK	2.9354	0.031783
3	YPL081W	RPS9A;YS11;rp21;S13;S4;YPL081W	1	51.61	187	_KAEAS(ph)GEAADEADEADEE_	KAEAS(1)GEAADEADEADEE	KAEAS(187)GEAADEADEADEE	2.945	0.031341
2	YMR039C	SUB1;TSP1;YMR039C;YM9532.04C	1	28.95	45.404	_LLS(ph)DDEYEDDNNNDSTNNDKDK_	LLS(0.5)DDEY(0.5)EDDNNNDSTNNDKDK	LLS(0)DDEY(0)EDDNNNDS(-39.44)T(-39.44)NNDKDK	2.9757	0.029763
3	YMR039C	SUB1;TSP1;YMR039C	1	29.36	60.547	_LLS(ph)DDEYEDDNNNDSTNNDKDK_	LLS(1)DDEYEDDNNNDSTNNDKDK	LLS(53.59)DDEYEDDNNNDS(-53.59)T(-53.63)NNDKDK	2.9758	0.029979
3	YDR507C	GIN4;ERC47;YDR507C	1	31.4	147.5	_FLGS(ph)SFNIDK_	FLGS(0.5)S(0.5)FNIDK	FLGS(0)S(0)FNIDK	2.9854	0.029567
2	YOR175C	ALE1;LCA1;LPT1;SLC4;YOR175C;O3635	1	69.6	170.84	_DISASS(ph)PNLGGILK_	DISAS(0.001)S(0.999)PNLGGILK	DIS(-81.26)AS(-29.7)S(29.7)PNLGGILK	3.0008	0.028807
3	YOR175C	ALE1;SLC4;LPT1;LCA1;YOR175C	1	72.25	170.84	_DISASS(ph)PNLGGILK_	DISAS(0.001)S(0.999)PNLGGILK	DIS(-68.48)AS(-29.7)S(29.7)PNLGGILK	3.0008	0.02892
2	YML034W	SRC1;YML034W/YML033W	1	36.57	121.34	_HLNLLSS(ph)DSEIEQDYQK_	HLNLLS(0.005)S(0.995)DSEIEQDYQK	HLNLLS(-23.39)S(23.39)DS(-34.31)EIEQDY(-95.13)QK	3.0045	0.028669
2	YGL093W	SPC105;YGL093W	1	29.61	114.35	_M(ox)S(ph)PITFSDVDNK_	MS(1)PITFSDVDNK	MS(38.04)PIT(-38.04)FS(-59.75)DVDNK	3.0213	0.028047
3	YGL093W	SPC105;YGL093W	1	29.61	114.35	_M(ox)S(ph)PITFSDVDNK_	MS(1)PITFSDVDNK	MS(38.04)PIT(-38.04)FS(-59.75)DVDNK	3.0274	0.027834
2	YPL081W	RPS9A;RPS13A;YS11A;YPL081W	1	51.61	180.61	_KAEAS(ph)GEAADEADEADEE_	KAEAS(1)GEAADEADEADEE	KAEAS(180.61)GEAADEADEADEE	3.0337	0.0276
2	YKL060C	FBA1;YKL060C;YKL320	1	58.64	147.94	_DY(ph)IM(ox)SPVGNPEGPEKPNKK_	DY(0.5)IMS(0.5)PVGNPEGPEKPNKK	DY(0)IMS(0)PVGNPEGPEKPNKK	3.0622	0.0266
3	YOR273C	TPO4;YOR273C	1	31.62	143.95	_NEPISNS(ph)LYSAIK_	NEPISNS(0.999)LYSAIK	NEPIS(-35.18)NS(35.18)LYS(-35.18)AIK	3.0867	0.025569
1	YNL118C	DCP2;PSU1;YNL118C;N1917	1	35.34	84.823	_NPISSTVSSNQQS(ph)PK_	NPISSTVSSNQQS(1)PK	NPIS(-79.22)S(-72.99)T(-68.03)VS(-40.77)S(-39.49)NQQS(39.49)PK	3.0876	0.027411
3	YKR060W	UTP30;YKR060W	1	39.62	145.18	_NEDLS(ph)DIKL_	NEDLS(1)DIKL	NEDLS(35.34)DIKL	3.0977	0.025169
2	YKR060W	UTP30;YKR060W	1	39.62	126.15	_NEDLS(ph)DIKL_	NEDLS(1)DIKL	NEDLS(35.34)DIKL	3.1069	0.025113
2	YDR507C	GIN4;YDR507C;D9719.13	1	28.72	116.12	_FLGS(ph)SFNIDK_	FLGS(0.5)S(0.5)FNIDK	FLGS(0)S(0)FNIDK	3.1236	0.024577
2	YML057W	CNA2;CMP2;YML057W;YM9958.05	1	36.39	101.53	_SEATPQPATSAS(ph)PK_	SEATPQPATS(0.06)AS(0.94)PK	S(-95.76)EAT(-77.29)PQPAT(-33.98)S(-11.95)AS(11.95)PK	3.176	0.022985
3	YGR167W	CLC1;SCD4;YGR167W	1	53.76	132.41	_EAEILGDEFKTEQDDILETEAS(ph)PAKDDDEIR_	EAEILGDEFKTEQDDILETEAS(1)PAKDDDEIR	EAEILGDEFKT(-93.44)EQDDILET(-33.45)EAS(33.45)PAKDDDEIR	3.1794	0.022412
3	YML057W	CMP2;CNA2;YML057W	1	36.39	101.53	_SEATPQPATSAS(ph)PK_	SEATPQPAT(0.001)S(0.06)AS(0.939)PK	S(-78.68)EAT(-54.06)PQPAT(-28.69)S(-11.95)AS(11.95)PK	3.187	0.022173
3	YKL060C	FBA1;LOT1;YKL060C	1	58.64	147.94	_DYIM(ox)S(ph)PVGNPEGPEKPNKK_	DYIMS(1)PVGNPEGPEKPNKK	DYIMS(52.07)PVGNPEGPEKPNKK	3.2168	0.021257
1	YLR330W	CHS5;CAL3;YLR330W;L8543.18	1	75.21	141.48	_DATESVAVEPS(ph)NEDVKPEEK_	DAT(0.004)ES(0.007)VAVEPS(0.988)NEDVKPEEK	DAT(-23.46)ES(-21.43)VAVEPS(21.43)NEDVKPEEK	3.2382	0.022557
3	YDL135C	RDI1;YDL135C	1	47.7	208.96	_NLDAEDES(ph)LAK_	NLDAEDES(1)LAK	NLDAEDES(107.9)LAK	3.2439	0.020463
2	YKL060C	FBA1;YKL060C;YKL320	1	58.64	147.94	_DYIM(ox)S(ph)PVGNPEGPEKPNKK_	DYIMS(1)PVGNPEGPEKPNKK	DY(-70.24)IMS(70.24)PVGNPEGPEKPNKK	3.2651	0.020528
3	YDR507C	GIN4;YDR507C;D9719.13	1	31.4	147.5	_FLGS(ph)SFNIDK_	FLGS(0.94)S(0.06)FNIDK	FLGS(11.95)S(-11.95)FNIDK	3.275	0.019588
2	YDL225W	SHS1;SEP7;YDL225W	1	50.15	120.67	_KNDTYTDLASIAS(ph)GRD_	KNDT(0.019)Y(0.019)T(0.019)DLAS(0.204)IAS(0.738)GRD	KNDT(-15.8)Y(-15.8)T(-15.8)DLAS(-5.58)IAS(5.58)GRD	3.2753	0.020264
1	YOR220W	RCN2;WSP1;YOR220W;YOR50-10	1	42.84	104.84	_NKPLLSINT(ph)DPGVTGVDSSSLNK_	NKPLLS(0.001)INT(0.997)DPGVT(0.001)GVDSSSLNK	NKPLLS(-28.88)INT(28.88)DPGVT(-28.88)GVDS(-53.94)S(-53.94)S(-53.94)LNK	3.2771	0.021459
3	YPR156C	TPO3;YPR156C	1	41.44	237.12	_S(ph)LQDM(ox)GVSSK_	S(1)LQDMGVSSK	S(221.81)LQDMGVS(-221.81)S(-226.57)K	3.311	0.018624
2	YPR156C	TPO3;YPR156C;P9584.7	1	40.95	154.97	_S(ph)LQDM(ox)GVSSK_	S(1)LQDMGVSSK	S(143.87)LQDMGVS(-143.87)S(-149.85)K	3.311	0.019374
2	YDR080W	VPS41;FET2;VAM2;YDR080W;D446;YD8554.13	1	35.91	82.056	_TIDESNS(ph)ISDENNVDNKR_	TIDES(0.018)NS(0.98)IS(0.003)DENNVDNKR	T(-52.57)IDES(-17.47)NS(17.47)IS(-25.56)DENNVDNKR	3.3145	0.01929
2	YGR167W	CLC1;YGR167W	1	53.76	132.41	_EAEILGDEFKTEQDDILETEAS(ph)PAKDDDEIR_	EAEILGDEFKTEQDDILETEAS(1)PAKDDDEIR	EAEILGDEFKT(-93.44)EQDDILET(-33.45)EAS(33.45)PAKDDDEIR	3.3265	0.018999
3	YDR418W	RPL12B;uL11;YL23;L12B;L15B;L11;YDR418W	1	53.75	145.18	_IGPLGLS(ph)PK_	IGPLGLS(1)PK	IGPLGLS(145.18)PK	3.3389	0.017912
2	YDR418W;YEL054C	RPL12A;RPL15B;YEL054C;RPL12B;RPL15A;YDR418W;D9461.7;RPL12A;RPL15B;YEL054C;RPL12B;RPL15A;YDR418W;D9461.7	1	51.53	126.15	_IGPLGLS(ph)PK_	IGPLGLS(1)PK	IGPLGLS(126.15)PK	3.342	0.018635
2	YOL109W	ZEO1;YOL109W;O0738	1	34.56	122.28	_EQAEAS(ph)IDNLK_	EQAEAS(1)IDNLK	EQAEAS(30)IDNLK	3.3448	0.018569
2	YDL135C	RDI1;YDL135C;D2175	1	45.59	171.02	_NLDAEDES(ph)LAK_	NLDAEDES(1)LAK	NLDAEDES(107.9)LAK	3.3866	0.017625
1	YBL032W	YBL032W;YBL0418	1	16.35	84.823	_KLEAAEGDATVVT(ph)ER_	KLEAAEGDATVVT(1)ER	KLEAAEGDAT(-41.13)VVT(41.13)ER	3.4028	0.018291
2	YDR170C	SEC7;YDR170C;YD9395.01C;YD9489.05C	1	22.7	91.202	_S(ph)NNTSFFDVWGK_	S(1)NNTSFFDVWGK	S(36.6)NNT(-36.6)S(-47.82)FFDVWGK	3.4052	0.017222
3	YPL049C	DIG1;RST1;YPL049C	1	31.95	86.649	_VNDSYDS(ph)PLSGTASTGK_	VNDS(0.113)YDS(0.886)PLS(0.001)GTASTGK	VNDS(-8.94)YDS(8.94)PLS(-29.2)GT(-46.1)AS(-47.49)T(-47.49)GK	3.4203	0.015998
3	YDR170C	SEC7;YDR170C	1	36.05	112.01	_S(ph)NNTSFFDVWGK_	S(1)NNTSFFDVWGK	S(36.73)NNT(-36.73)S(-54.05)FFDVWGK	3.421	0.015981
2	YPL049C	DIG1;RST1;YPL049C;P7102.02	1	30.99	76.632	_VNDSYDS(ph)PLSGTASTGK_	VNDS(0.002)Y(0.012)DS(0.975)PLS(0.012)GTASTGK	VNDS(-27.93)Y(-19.18)DS(19.18)PLS(-19.18)GT(-36.08)AS(-43.59)T(-43.59)GK	3.4233	0.016839
1	YPL058C	PDR12;YPL058C;LPE14C	1	42.66	181.59	_HLSNILS(ph)NEEGIER_	HLS(0.002)NILS(0.998)NEEGIER	HLS(-26.07)NILS(26.07)NEEGIER	3.4782	0.016639
1	YGR178C	PBP1;MRS16;YGR178C	1	23.77	54.605	_TVS(ph)PTTQISAGK_	T(0.133)VS(0.865)PT(0.002)TQISAGK	T(-8.14)VS(8.14)PT(-26.77)T(-33.95)QIS(-48.56)AGK	3.5367	0.015466
1	YOR220W	RCN2;WSP1;YOR220W;YOR50-10	1	42.84	104.84	_NKPLLS(ph)INTDPGVTGVDSSSLNK_	NKPLLS(0.842)INT(0.158)DPGVTGVDSSSLNK	NKPLLS(7.27)INT(-7.27)DPGVT(-37.65)GVDS(-50.1)S(-50.1)S(-53.02)LNK	3.5556	0.015108
2	YPL058C	PDR12;YPL058C;LPE14C	1	22.04	81.177	_(ac)SST(ph)DEHIEK_	S(0.088)S(0.044)T(0.867)DEHIEK	S(-9.91)S(-12.92)T(9.91)DEHIEK	3.566	0.014127
3	YOL109W	ZEO1;YOL109W	1	47.48	136.96	_EQAEAS(ph)IDNLK_	EQAEAS(1)IDNLK	EQAEAS(30)IDNLK	3.5976	0.012542
3	YIL106W	MOB1;YIL106W	1	73.2	147.94	_WNTANAANNAGSVS(ph)PTK_	WNTANAANNAGS(0.001)VS(0.999)PT(0.001)K	WNT(-120.95)ANAANNAGS(-32.25)VS(32.25)PT(-32.25)K	3.6773	0.011257
2	YIL106W	MOB1;YIL106W	1	71.76	109.39	_WNTANAANNAGSVS(ph)PTK_	WNTANAANNAGSVS(0.933)PT(0.067)K	WNT(-102.05)ANAANNAGS(-32.76)VS(11.44)PT(-11.44)K	3.6802	0.012299
3	YBR189W	RPS9B;uS4;YS11;rp21;RPS13A;SUP46;S13;S4;S9B;YBR189W	1	81.38	246.74	_KAEAS(ph)GEAAEEAEDEE_	KAEAS(1)GEAAEEAEDEE	KAEAS(91.4)GEAAEEAEDEE	3.7545	0.010147
1	YGL173C	KEM1;DST2;RAR5;SEP1;SKI1;XRN1;YGL173C;G1645	1	15.47	67.915	_KGEIKPSSGTNSTECQS(ph)PK_	KGEIKPSSGTNST(0.006)ECQS(0.993)PK	KGEIKPS(-46.18)S(-50.83)GT(-46.18)NS(-35.1)T(-21.92)ECQS(21.92)PK	3.7551	0.011824
1	YEL046C	GLY1;YEL046C;SYGP-ORF34	1	71.81	192.36	_SEST(ph)EVDVDGNAIR_	S(0.023)ES(0.116)T(0.861)EVDVDGNAIR	S(-15.64)ES(-8.7)T(8.7)EVDVDGNAIR	3.7555	0.011818
2	YBR189W	RPS9B;RPS13B;SUP46;YBR189W;YBR1317	1	81.38	214.2	_KAEAS(ph)GEAAEEAEDEE_	KAEAS(1)GEAAEEAEDEE	KAEAS(91.39)GEAAEEAEDEE	3.7569	0.011217
1	YEL046C	GLY1;YEL046C;SYGP-ORF34	1	71.81	192.36	_SES(ph)TEVDVDGNAIR_	S(0.078)ES(0.921)T(0.001)EVDVDGNAIR	S(-10.69)ES(10.69)T(-29.7)EVDVDGNAIR	3.7774	0.011509
1	YKL054C	YKL054C;YKL308	1	51.75	195.04	_T(ph)ESPLENVAELKK_	T(0.627)ES(0.373)PLENVAELKK	T(2.25)ES(-2.25)PLENVAELKK	3.9251	0.0096348
1	YOR042W	CUE5;YOR042W	2	39.8	89.162	_VVAETTYIDT(ph)PDT(ph)ETK_	VVAETTYIDT(0.994)PDT(0.503)ET(0.503)K	VVAET(-57.81)T(-51.56)Y(-36.87)IDT(19.6)PDT(0)ET(0)K	3.9602	0.0092396
2	YLR138W	NHA1;YLR138W;L3149;L9606.4	2	28.83	105.09	_M(ox)DT(ph)QM(ox)T(ph)LSGDEGEAEEGGGRK_	MDT(1)QMT(0.985)LS(0.015)GDEGEAEEGGGRK	MDT(50.38)QMT(18.22)LS(-18.22)GDEGEAEEGGGRK	4.0525	0.0079229
3	YOL109W	ZEO1;YOL109W	1	49.1	193.4	_NEAT(ph)PEAEQVKK_	NEAT(1)PEAEQVKK	NEAT(93.54)PEAEQVKK	4.0909	0.0065105
1	YOR042W	CUE5;YOR042W	2	39.8	89.162	_VVAETTYIDT(ph)PDT(ph)ETK_	VVAETTYIDT(0.999)PDT(0.92)ET(0.081)K	VVAET(-55.18)T(-47.49)Y(-39.16)IDT(30.22)PDT(10.62)ET(-10.62)K	4.1676	0.0072385
3	YAL005C	SSA1;YG100;YAL005C	1	52.31	150.24	_NQLESIAYS(ph)LK_	NQLESIAYS(1)LK	NQLES(-71.7)IAYS(71.7)LK	4.1901	0.0057269
2	YAL005C;YLL024C	SSA1;YAL005C;SSA2;YLL024C;L0931	1	43.93	122.28	_NQLESIAYS(ph)LK_	NQLESIAY(0.002)S(0.998)LK	NQLES(-74.13)IAY(-27.93)S(27.93)LK	4.2223	0.0065205
1	YJL082W	IML2;YJL082W;J1007	1	16.15	54.707	_TNDS(ph)SLLPGYMDSATLLHPGK_	T(0.011)NDS(0.948)S(0.04)LLPGYMDSATLLHPGK	T(-19.26)NDS(13.73)S(-13.73)LLPGY(-43.07)MDS(-45.73)AT(-43.07)LLHPGK	4.2795	0.0063592
1	YKL054C	YKL054C;YKL308	1	51.75	195.04	_KTES(ph)PLENVAELKK_	KTES(1)PLENVAELKK	KT(-67.1)ES(67.1)PLENVAELKK	4.2887	0.0062922
2	YOL109W	ZEO1;YOL109W;O0738	1	33.85	124.53	_NEAT(ph)PEAEQVKK_	NEAT(1)PEAEQVKK	NEAT(124.53)PEAEQVKK	4.317	0.0058585
1	YEL046C	GLY1;YEL046C;SYGP-ORF34	1	71.81	192.36	_S(ph)ESTEVDVDGNAIR_	S(0.993)ES(0.007)TEVDVDGNAIR	S(21.52)ES(-21.52)T(-51.22)EVDVDGNAIR	4.338	0.0059462
1	YOR042W	CUE5;YOR042W	2	39.8	89.162	_VVAETTYIDT(ph)PDT(ph)ETK_	VVAETTYIDT(0.999)PDT(0.92)ET(0.081)K	VVAET(-55.18)T(-47.49)Y(-39.16)IDT(30.22)PDT(10.62)ET(-10.62)K	4.3859	0.0056298
3	YGR048W	UFD1;YGR048W	1	36.47	124.22	_APKS(ph)PEVIEID_	APKS(1)PEVIEID	APKS(124.22)PEVIEID	4.6742	0.003115
2	YGR048W	UFD1;PIP3;YGR048W	1	34.62	107.9	_APKS(ph)PEVIEID_	APKS(1)PEVIEID	APKS(107.9)PEVIEID	4.6813	0.0039173
1	YDL182W	LYS20;YDL182W;D1298	1	39.17	140.28	_KNDS(ph)DVPELATIPAAK_	KNDS(1)DVPELATIPAAK	KNDS(112.5)DVPELAT(-112.5)IPAAK	4.7171	0.0038843
1	YGR093W	DRN1;YGR093W	1	25.03	108.14	_RPLETETENS(ph)FDGDK_	RPLETETENS(1)FDGDK	RPLET(-44.29)ET(-34.1)ENS(34.1)FDGDK	5.0033	0.0028459
1	YOR217W	RFC1;CDC44;YOR217W;YOR50-7	1	23.98	93.536	_KMPVSNVIDVSET(ph)PEGEK_	KMPVSNVIDVS(0.383)ET(0.617)PEGEK	KMPVS(-74.54)NVIDVS(-2.07)ET(2.07)PEGEK	5.0739	0.0026388
3	YOR198C	BFR1;YOR198C	1	55.56	242.05	_VVADDLVLVT(ph)PK_	VVADDLVLVT(1)PK	VVADDLVLVT(140.37)PK	5.2172	0.0016235
2	YOR198C	BFR1;YOR198C	1	55.56	181.28	_VVADDLVLVT(ph)PK_	VVADDLVLVT(1)PK	VVADDLVLVT(114.35)PK	5.2229	0.0022115
1	YDL182W	LYS20;YDL182W;D1298	1	32.94	108.14	_(ca)NFHAEVST(ph)PQVLSAK_	NFHAEVS(0.018)T(0.963)PQVLS(0.018)AK	NFHAEVS(-17.21)T(17.21)PQVLS(-17.21)AK	5.5976	0.0015308
1	YOR198C	BFR1;YOR198C	1	77.07	165	_VVADDLVLVT(ph)PK_	VVADDLVLVT(1)PK	VVADDLVLVT(54.61)PK	5.7514	0.001311
1	YDL182W	LYS20;YDL182W;D1298	1	32.94	108.14	_NFHAEVS(ph)TPQVLSAK_	NFHAEVS(0.901)T(0.099)PQVLSAK	NFHAEVS(9.58)T(-9.58)PQVLS(-41.13)AK	5.8667	0.0011687
1	YDL051W	LAH1;LHP1;YLA1;YDL051W	1	26.03	72.844	_RNS(ph)FAVIEFTPEVLDR_	RNS(1)FAVIEFTPEVLDR	RNS(52.85)FAVIEFT(-52.85)PEVLDR	6.0467	0.00097901
1	YDL042C	SIR2;MAR1;YDL042C;D2714	1	5.29	50.339	_VQDLGS(ph)AISVTNVEDPLAKK_	VQDLGS(0.997)AIS(0.003)VTNVEDPLAKK	VQDLGS(25.01)AIS(-25.01)VT(-38.01)NVEDPLAKK	11.299	1.3902e-05
2	YJL084C	YJL084C;J0934	2	4.39	47.457	_SLNRRESVQDNLPS(ph)T(ph)IR_	SLNRRESVQDNLPS(1)T(1)IR	S(-38.32)LNRRES(-38.32)VQDNLPS(38.32)T(38.32)IR	166.31	9.38e-19
